# Supplementary material for: Polyoxometalate nanocluster-infused triple IPN hydrogels for excellent microplastic removal from contaminated water: detection, photodegradation, and upcycling
Source: Royal Society of Chemistry journal article supplement (doi:10.1039/d3nr06115a), 2024-01-01
Supplement: d3nr06115a1.pdf [file d3nr06115a1.pdf]

*Supplementary information*

**Polyoxometalate nanocluster-infused triple IPN hydrogels  
for excellent microplastic removal from contaminated  
water: detection, photodegradation, and upcycling**

Soumi Dutta\*, Ashok Misra, Suryasarathi Bose\*

\*Corresponding authors, email address: [soumidutta.ce@gmail.com](mailto:soumidutta.ce@gmail.com) and [sbose@iisc.ac.in](mailto:sbose@iisc.ac.in)

Department of Materials Engineering, Indian Institute of Science, Bengaluru 560012, India

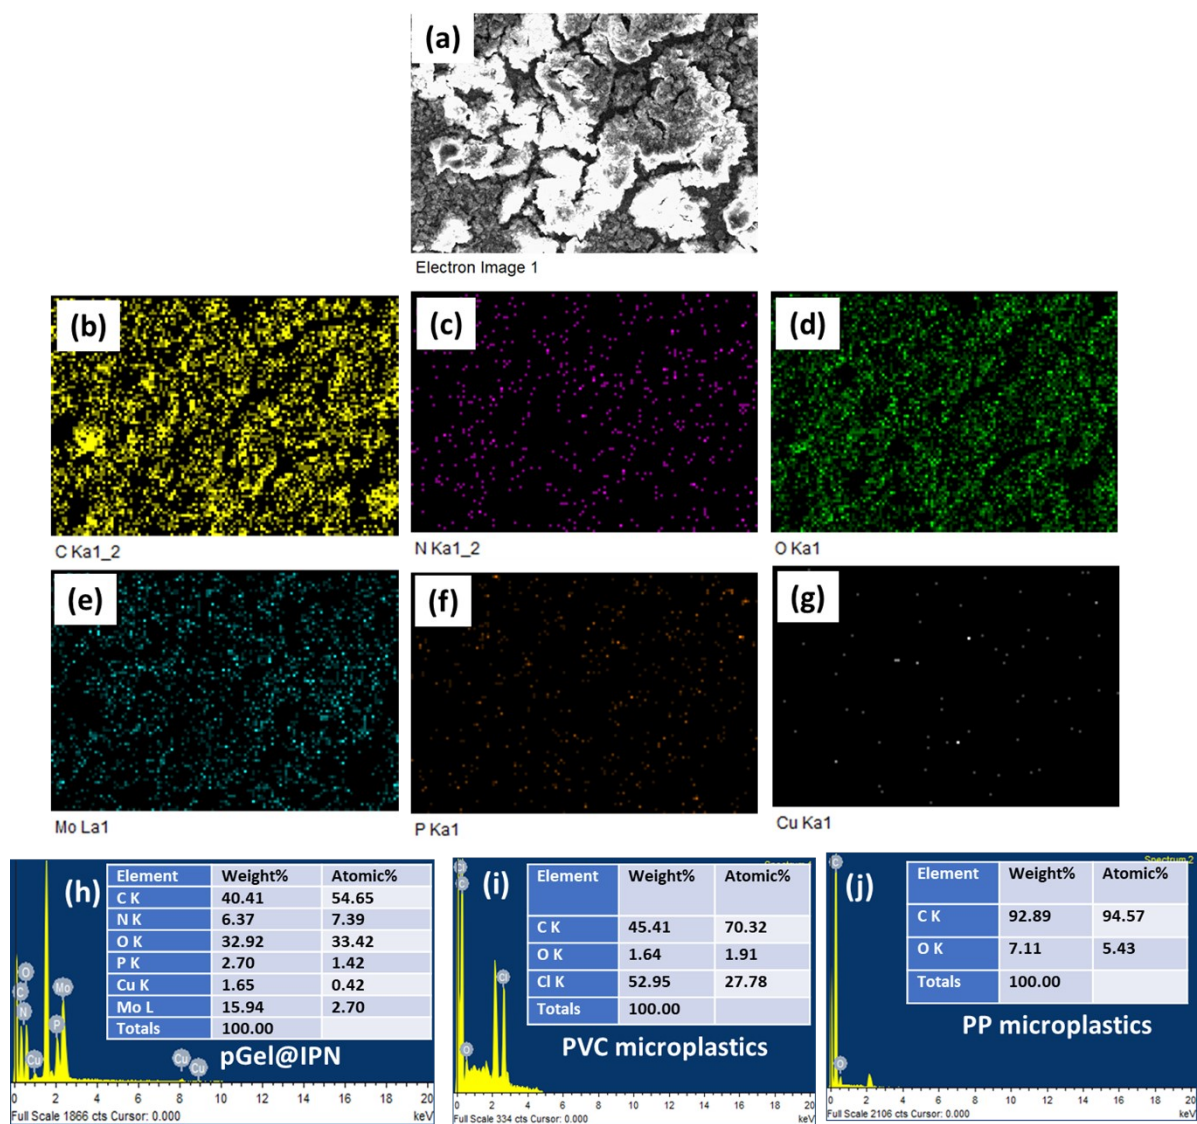

**Fig. S1** (a-f) Electronic SEM images and elemental mapping of pGel@IPN hydrogel, respectively; EDX spectrum and composition of (g) pGel@IPN hydrogel, (h) PVA microplastic, and (j) PP microplastic.

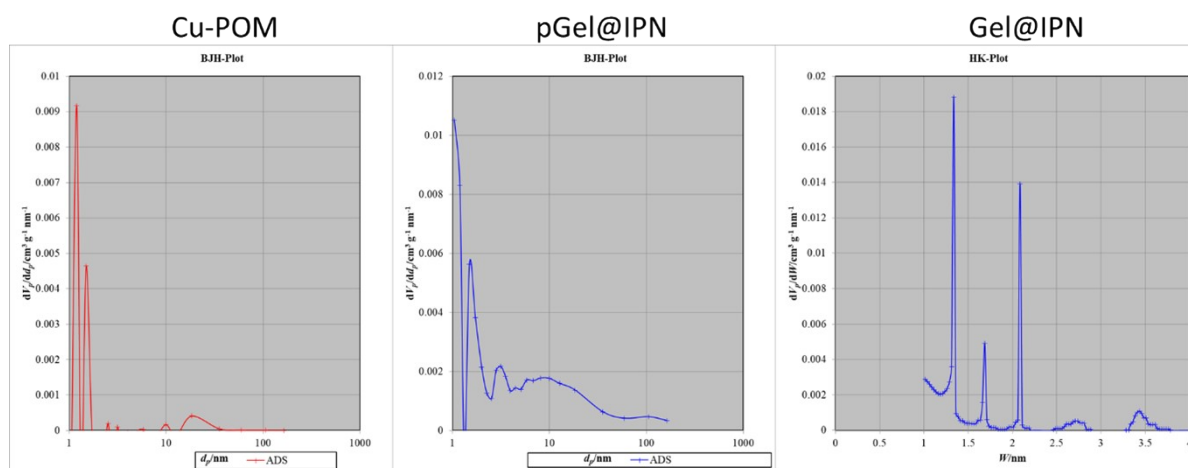

| BET analysis Parameters                        | Cu-POM   | pGel@IPN | Gel@IPN   |
|------------------------------------------------|----------|----------|-----------|
| BET surface area, $a_{s,BET}$ [ $m^2 g^{-1}$ ] | 0.4629   | 35.113   | 3.0823    |
| Average pore diameter [nm]                     | 32.691   | 12.464   | 1.4719    |
| Average Pore Volume [ $cm^3 g^{-1}$ ]          | 0.003783 | 0.1094   | 0.0022685 |

**Fig. S2** the pore size distribution plot for Cu-POM, pGel@IPN, and Gel@IPn, illustrating their respective structural characteristics. Additionally, the BET (Brunauer-Emmett-Teller) analysis parameters for these materials are summarized in the accompanying table.

### Text S1: Water Contact Angle

The water contact angle (WCA) is a crucial parameter assessing the surface wettability of prepared hydrogel, commonly employed to evaluate hydrophilicity and hydrophobicity. We used the sessile drop method in a goniometer to determine the WCA. A surface with a WCA less than  $90^\circ$  is classified as hydrophilic, indicating an affinity for water, while a high contact angle ( $>90^\circ$ ) suggests hydrophobicity, repelling water. In this study, the WCA of the IPN hydrogel matrix system was measured <sup>1</sup>. Detailed contact angle analysis focused on the position and angle of the contact angle is displayed in Fig. 4f (manuscript). For the prepared hydrogel, a WCA of  $\sim 50^\circ \pm 2^\circ$  indicates a strong affinity for water, signifying a hydrophilic

hydrogel surface. The enlarged view of the WCA for the pGel@IPN hydrogel surface is illustrated in the manuscript, Fig. 4f, inset. Conventionally, the contact angle is measured from the liquid side, representing the angle a liquid creates with an ideal solid surface with specific characteristics. This definition captures the intricate interplay between surface characteristics and liquid interactions.

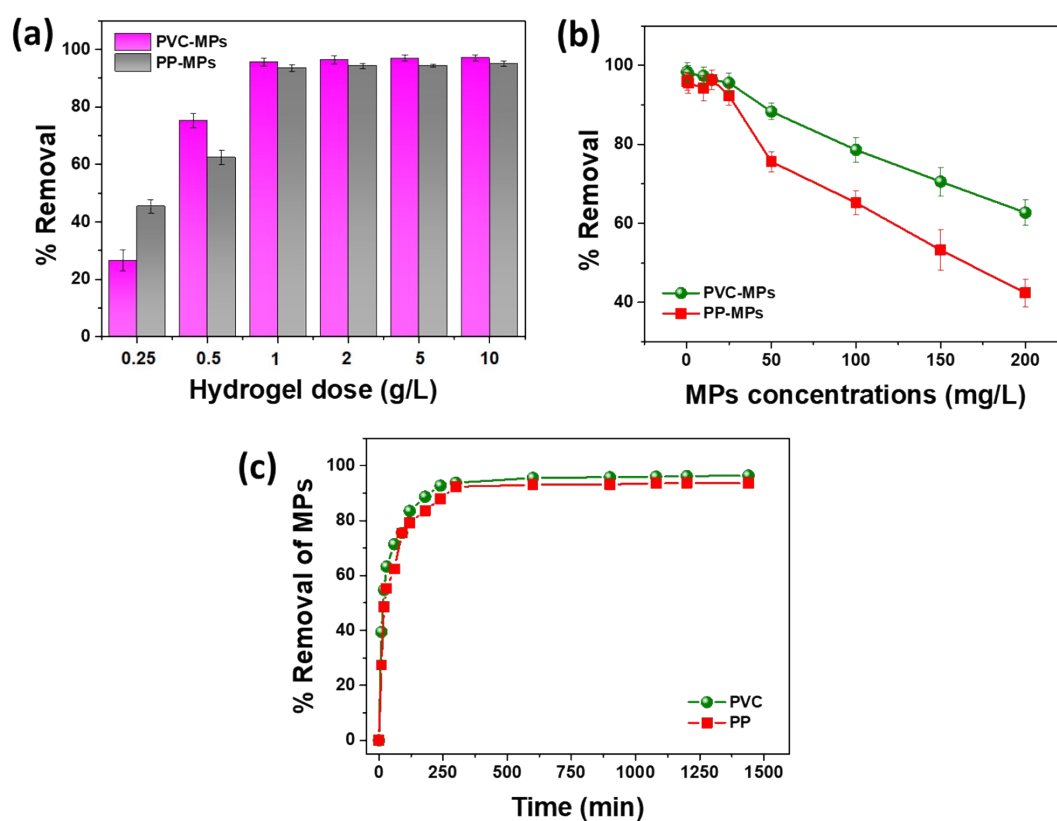

**Fig. S3** Microplastic removal efficiency by varying different (a) hydrogel dose, (b) Microplastics concentrations and (c) contact time. (Experimental condition: contact time: 300 min, initial concentration of MPs: 25 mg/L; pGel@IPN hydrogel dose: 1g/L)

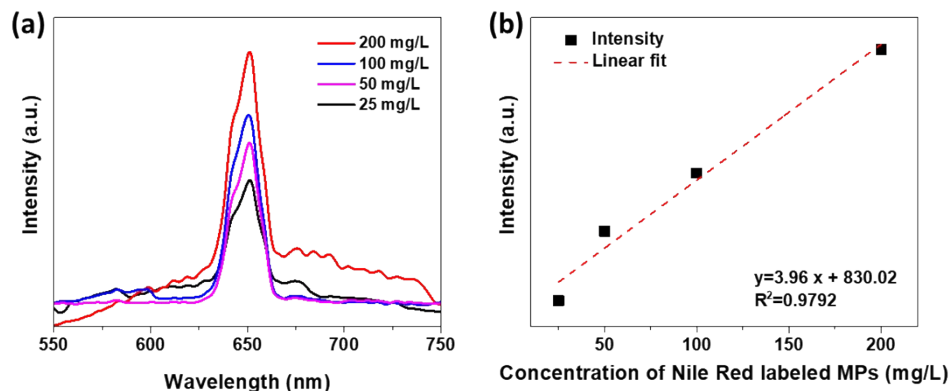

**Fig. S4** (a) The fluorescent Nile red dye-tagged PVC-MPs with varying concentrations and their corresponding wavelengths. (b) the graph showcases the calibration curve fitted for the detection of microplastics, providing an analytical framework for quantifying microplastic concentrations based on fluorescence intensity.

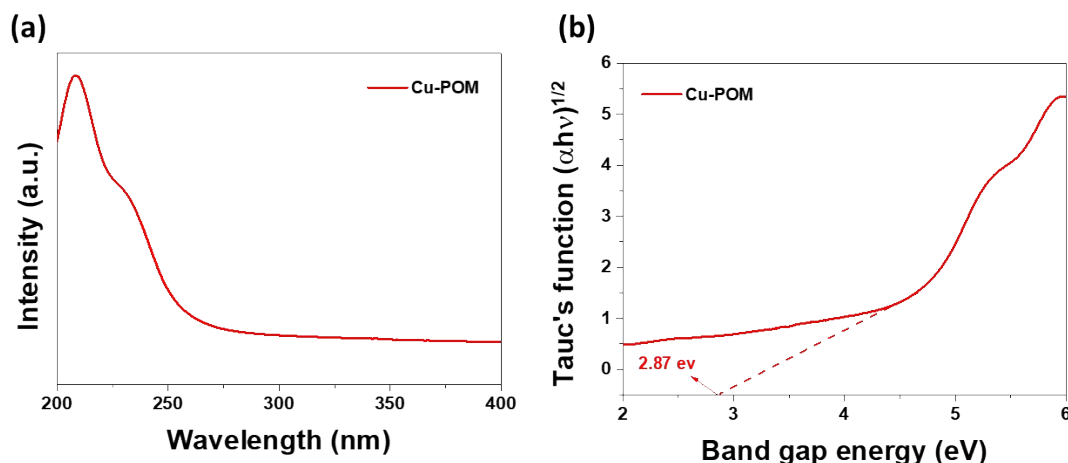

**Fig. S5** (a) UV-vis spectra of Cu-POM nanocluster in water, (b) respective band gap energy ( $E_g$ ) determination from the Tauc plot.

### Text S2: Tauc plot for band gap energy determination of Cu-POM nanocluster

The Tauc plot is a graphical method used for determining the band gap energy of a material from its absorption spectrum. here we have tried to evaluate the band gap energy of the catalyst Cu-substitute polyoxometalate (Cu-POM). The formula for the Tauc plot is given by  $(\alpha h\nu)^{1/n} = A(h\nu - E_g)$ , where A is a constant,  $E_g$  is the band gap energy, h is Planck's constant,

$\nu$  is the photon frequency and  $n$  depends on the nature of the electronic transition if  $n = 2$  (for direct band gap) or  $n = 1/2$  (for indirect band gap). It involves plotting the  $(\alpha h\nu)^{1/n}$  against the photon energy ( $h\nu$ ). The plot typically exhibits a linear region, and extrapolating the linear portion to the energy axis allows for the determination of the band gap energy.

**Table S1.** Kinetic parameters for PVC and PP microplastic adsorption on pGel@IPN hydrogel

| Kinetic models                 |                       | Parameters                        | PVC-MPs  | PP-MPs   |
|--------------------------------|-----------------------|-----------------------------------|----------|----------|
| Pseudo second-order model      |                       | $q_e$ (mg g <sup>-1</sup> )       | 48.47523 | 47.8455  |
|                                |                       | $K_2$ (min <sup>-1</sup> )        | 0.00123  | 0.0008   |
|                                |                       | $R^2$                             | 0.99173  | 0.98547  |
|                                |                       | Adj. $R^2$                        | 0.9911   | 0.98426  |
|                                |                       | Root-MSE (SD)                     | 1.29567  | 1.31272  |
| Intra-particle diffusion model | 1 <sup>st</sup> stage | $C$ (mg/g)                        | 5.87315  | 1.90498  |
|                                |                       | $K_d$ (mg/g min <sup>-0.5</sup> ) | 0.42586  | 17.66838 |
|                                |                       | Adj. $R^2$                        | 0.99479  | 0.91553  |
|                                |                       | Root-MSE (SD)                     | 2.04678  | 9.00283  |
|                                | 2 <sup>nd</sup> stage | $C$ (mg/g)                        | 1.63801  | 5.18658  |
|                                |                       | $K_d$ (mg/g min <sup>-0.5</sup> ) | 22.81023 | -0.57365 |
|                                |                       | Adj. $R^2$                        | 0.97872  | 0.97488  |
|                                |                       | Root-MSE (SD)                     | 1.59595  | 7.79743  |
|                                | 3 <sup>rd</sup> stage | $C$ (mg/g)                        | 0.11824  | 0.15333  |
|                                |                       | $K_d$ (mg/g min <sup>-0.5</sup> ) | 44.1475  | 41.72955 |
|                                |                       | Adj. $R^2$                        | 0.67822  | 0.56458  |
|                                |                       | Root-MSE (SD)                     | 3.33563  | 8.77025  |

**Table S2.** Isotherm parameters for PVC and PP microplastic adsorption on POM-HG@IPN hydrogel

| <b>Isotherm models</b> | <b>Parameters</b>                    | <b>PVC-MPs</b> | <b>PP-MPs</b> |
|------------------------|--------------------------------------|----------------|---------------|
| Langmuir isotherm      | $Q_m$ (mg/g)                         | 321.86927      | 144.29208     |
|                        | $b$ (L/mg)                           | 0.00322        | 0.00769       |
|                        | $R^2$                                | 0.99989        | 0.99706       |
|                        | Adj. $R^2$                           | 0.99988        | 0.99664       |
|                        | Root-MSE (SD)                        | 0.52797        | 1.94359       |
| Freundlich isotherm    | $K_f$ [(mg/g)(L/mg) <sup>1/n</sup> ] | 2.04517        | 3.06172       |
|                        | $1/n$                                | 1.27844        | 1.56157       |
|                        | $R^2$                                | 0.99714        | 0.98512       |
|                        | Adj. $R^2$                           | 0.99673        | 0.98299       |
|                        | Root-MSE (SD)                        | 2.69965        | 4.37094       |

**Table S3.** Thermodynamics parameter for PVC dye and PP microplastic adsorption on pGel@IPN hydrogel.

| Dye     | Temperature (K) | $\Delta G^\circ$ (kJ/mol) | $\Delta H^\circ$ (kJ/mol) | $\Delta S^\circ$ (kJ/mol K) | $R^2$   |
|---------|-----------------|---------------------------|---------------------------|-----------------------------|---------|
| PVC-MPs | 293             | -4.0467                   | 27.33548                  | 0.10735                     | 0.96433 |
|         | 303             | -5.33974                  |                           |                             |         |
|         | 313             | -6.18373                  |                           |                             |         |
| PP-MPs  | 293             | -7.7993                   | 67.87938                  | 0.25845                     | 0.99845 |
|         | 303             | -10.53341                 |                           |                             |         |
|         | 313             | -12.96161                 |                           |                             |         |

## References

- 1 T. Huhtamäki, X. Tian, J. T. Korhonen and R. H. Ras, *Nature protocols*, 2018, **13**, 1521–1538.
